# Supplementary material for: Llama and Alpaca Management in Germany—Results of an Online Survey among Owners on Farm Structure, Health Problems and Self-Reflection
Source: PubMed Central journal article supplement (PMC7825519; doi:10.3390/ani11010102), 2021-01-06
Supplement: animals-11-00102-s001.pdf [file animals-11-00102-s001.pdf]

# Document S1: complete survey results

## Part A: General information [Teil A: Allgemeine Angaben]

### 1. Which federal state is your farm located in? (single choice. n=255)

[In welchem Bundesland befindet sich Ihr Betrieb? (Einfachantwort. n=255)]

- North Rhine-Westphalia [Nordrhein-Westfalen]: 49 (19.2%)
- Lower Saxony [Niedersachsen]: 47 (18.4%)
- Bavaria [Bayern]: 45 (17.6%)
- Baden-Württemberg [Baden-Württemberg]: 21 (8.2%)
- Hesse [Hessen]: 16 (6.3%)
- Brandenburg [Brandenburg]: 14 (5.5%)
- Schleswig-Holstein [Schleswig-Holstein]: 14 (5.5%)
- Rhineland-Palatinate [Rheinland-Pfalz]: 11 (4.3%)
- Saxony [Sachsen]: 11 (4.3%)
- Thuringia [Thüringen]: 10 (3.9%)
- Saxony-Anhalt [Sachsen-Anhalt]: 7 (2.7%)
- Mecklenburg-Vorpommern [Mecklenburg-Vorpommern]: 6 (2.4%)
- Saarland [Saarland]: 4 (1.6%)
- Berlin [Berlin]: 0 (0%)
- Bremen [Bremen]: 0 (0%)
- Hamburg [Hamburg]: 0 (0%)

### 2. What kind of South American camelids do you keep? (multiple choice. n=255)

[Was für Neuweltkameliden halten Sie? (Mehrfachantwort. n=255)]

- a. Alpacas [Alpakas]
  - b. Llamas [Lamas]
  - c. Alpaca and llama crossbreeds [Kreuzungen aus Lamas und Alpakas]
- 
- Alpacas only [Nur Alpakas]: 175 (68.6%)
  - Llamas and alpacas [Lamas und Alpakas]: 42 (16.5%)
  - Llamas only [Nur Lamas]: 27 (10.6%)
  - Llamas, alpacas and crossbreeds [Lamas, Alpakas und Kreuzungen]: 3 (1.2%)
  - Llamas and crossbreeds [Lamas und Kreuzungen]: 3 (1.2%)
  - Alpacas and crossbreeds [Alpakas und Kreuzungen]: 2 (0.8%)
  - Crossbreeds only [Nur Kreuzungen]: 0 (0%)
  - No information [Keine Angabe]: 3 (1.2%)

### 3. What type of alpaca do you keep? (If "yes" to question 2a. Multiple choice. n=222)

[Welchen Alpakatyp halten Sie? (Wenn „ja“ bei Frage 2a. Mehrfachantwort. n=222)]

- Huacaya [Huacaya]: 219 (98.6%)
- Suri [Suri]: 37 (16.7%)
- Other [Sonstiges]: 2 (0.9%)
  - "Huacaya/Suri-hybrid"

### 4. How many alpacas of which age group and sex do you keep? (If "yes" to question 2a. n=220)

[Wie viele Alpakas welcher Altersklasse und welchen Geschlechts halten Sie? (Wenn „ja“ bei Frage 2a. n=220)]

- Females <1 year [Stuten <1 Jahr]: 240 (7.8%)
- Females 1-3 years [Stuten 1-3 Jahre]: 467 (15.3%)

- Females 4-10 years [*Stuten 4-10 Jahre*]: 830 (27.1%)
- Females >10 year [*Stuten >10 Jahre*]: 181 (5.9%)
- Males <1 year [*Hengste <1 Jahr*]: 235 (7.7%)
- Males 1-3 years [*Hengste 1-3 Jahre*]: 273 (8.9%)
- Males 4-10 years [*Hengste 4-10 Jahre*]: 305 (10.0%)
- Males >10 years [*Hengste >10 Jahre*]: 75 (2.4%)
- Castrated males <1 year [*Wallache <1 Jahr*]: 17 (0.6%)
- Castrated males 1-3 years [*Wallache 1-3 Jahre*]: 132 (4.3%)
- Castrated males 4-10 years [*Wallache 4-10 Jahre*]: 268 (8.8%)
- Castrated males >10 years [*Wallache >10 Jahre*]: 39 (1.3%)

**5. Which type of llama do you keep?** (If “yes” to question 2b. Multiple choice. n=75)

[*Welchen Lamatyp halten Sie? (Wenn „ja“ bei Frage 2b. Mehrfachantwort. n=75)*]

- Woolly llama [*Woolly Lama*]: 49 (65.3%)
- Classic llama [*Classic Lama*]: 48 (64.0%)
- Suri llama [*Suri Lama*]: 21 (28.0%)
- Other [*Sonstiges*]: 9 (12.0%)
  - “Medium”; “Silky”; “Guanako”

**6. How many llamas of which age group and sex do you keep?** (If “yes” to question 2b. n=75)

[*Wie viele Lamas welcher Altersklasse und welchen Geschlechts halten Sie? (Wenn „ja“ bei Frage 2b. n=75)*]

- Females <1 year [*Stuten <1 Jahr*]: 33 (4.5%)
- Females 1-3 years [*Stuten 1-3 Jahre*]: 71 (9.6%)
- Females 4-10 years [*Stuten 4-10 Jahre*]: 192 (25.9%)
- Females >10 year [*Stuten >10 Jahre*]: 75 (10.1%)
- Males <1 year [*Hengste <1 Jahr*]: 19 (2.6%)
- Males 1-3 years [*Hengste 1-3 Jahre*]: 49 (6.6%)
- Males 4-10 years [*Hengste 4-10 Jahre*]: 65 (8.8%)
- Males >10 years [*Hengste >10 Jahre*]: 34 (4.6%)
- Castrated males <1 year [*Wallache <1 Jahr*]: 2 (0.3%)
- Castrated males 1-3 years [*Wallache 1-3 Jahre*]: 29 (3.9%)
- Castrated males 4-10 years [*Wallache 4-10 Jahre*]: 117 (15.8%)
- Castrated males >10 years [*Wallache >10 Jahre*]: 55 (7.4%)

**7. Do you have other farm animals among your livestock?** (Multiple choice. n=255)

[*Haben Sie andere Nutztiere in Ihrem Bestand? (Mehrfachantwort. n=255)*]

- No other farm animals [*keine anderen Nutztiere*]: 113 (44.3%)
- Poultry [*Geflügel*]: 99 (38.8%)
- Horses [*Pferde*]: 46 (18.0%)
- Sheep [*Schafe*]: 29 (11.4%)
- Goats [*Ziegen*]: 25 (9.8%)
- Cattle [*Rinder*]: 21 (8.2%)
- Pigs [*Schweine*]: 16 (6.3%)
- Other [*Sonstiges*]: 28 (11.0%)
  - “Donkeys” [*Esel*]; “Rabbits” [*Kaninchen*]; “Deer” [*Hirsche*]; “Ducks” [*Enten*]; “Moufflon” [*Muffelwild*]; “Geese” [*Gänse*]; “Bactrian camels” [*Trampeltiere*]; “Kangaroos” [*Kängurus*]; “Guinea pigs” [*Meerschweinchen*]; “Bees” [*Bienen*]; “Dogs” [*Hunde*]
- No information [*keine Antwort*]: 6 (2.4%)

**8. Since when have you kept South American camelids?** (Single choice. n=254)

[*Seit wann halten Sie Neuweltkameliden? (Einfachantwort. n=254)*]

- 1986: 1
- 1997: 1
- 1999: 1
- 2000: 1
- 2001: 1
- 2002: 3
- 2003: 2
- 2004: 2
- 2005: 9
- 2006: 7
- 2007: 7
- 2008: 6
- 2009: 12
- 2010: 12
- 2011: 24
- 2012: 10
- 2013: 15
- 2014: 19
- 2015: 22
- 2016: 23
- 2017: 20
- 2018: 29
- 2019: 27

**9. Which purposes do you keep your South American camelids for? (Multiple choice. n=255)**

*[Bitte geben Sie die Nutzungsrichtung Ihrer Neuweltkameliden an. (Mehrfachantwort. n=255)]*

- Hobby [*Hobby*]: 164 (64.3%)
- Wool [*Wolle*]: 142 (55.7%)
- Breeding [*Zucht*]: 132 (51.8%)
- Trekking [*Trekking*]: 127 (49.8%)
- Therapy [*Therapie*]: 66 (25.9%)
- Landscape conservation [*Landschaftspflege*]: 50 (19.6%)
- Meat [*Fleischgewinnung*]: 0 (0%)
- Herd protection for sheep [*Herdenschutz für Schafe*]: 0 (0%)
- Other [*Sonstiges*]: 10 (3.9%)
  - “Animal-based intervention” [*tiergestützte Intervention*]; “Seminars for managers” [*Seminare für Führungskräfte*]; “Nature hikes” [*Naturwanderungen*]; “Children’s birthday parties” [*Kindergeburtstage*]; “Tourism” [*Tourismus*]; “Paedagogy” [*Pädagogik*]; “Herd protection for chickens” [*Herdenschutz für Hühner*]

**10. Are the camelids your main source of income? (Single choice. n=255)**

*[Dient die Neuweltkamelidenhaltung dem Haupterwerb? (Einfachantwort. n=255)]*

- Yes [*Ja*]: 21 (8.2%)
- No, only on a sideline basis [*Nein, nur Nebenerwerb*]: 127 (49.8%)
- No income [*Nein, keine Einnahmen*]: 107 (42.0%)

**11. How many people are involved in taking care of your camelids? (Single choice. n=255)**

*[Wie viele Personen sind in die Betreuung der Neuweltkameliden eingebunden? (Einfachantwort. n=255)]*

- 1: 34 (13.3%)
- 2: 145 (56.9%)

- 3: 47 (18.4%)
- 4: 20 (7.8%)
- 5: 6 (2.4%)
- More than 5 [Mehr als 5]: 3 (1.2%)

**Part B: Husbandry [Teil B: Haltung]**

**12. How do you receive information about the camelid husbandry?** (Multiple choice. n=252)

[Wie informieren Sie sich über die Haltung von Neuweltkameliden? (Mehrfachantwort. n=252)]

- Books [Bücher]: 216 (85.7%)
- Seminars for further education [Fortbildungen]: 196 (77.8%)
- Llama/alpaca breeder [ZüchterIn]: 175 (69.4%)
- Web research [Internetrecherche]: 156 (61.9%)
- Veterinarian [Tierarzt/Tierärztin]: 144 (57.1%)
- Web forum [Internetforen]: 138 (54.8%)
- Journals [Zeitschriften]: 116 (46.0%)
- Family/friends [Familie/Freunde]: 45 (17.9%)
- Other [Sonstiges]: 19 (7.5%)
  - "Associations for South American camelids" [Neuweltkamelvereine]; "Shearer" [Scherer]; "Llama and alpaca shows" [Lama-/Alpaka-Shows]; "University of Veterinary Medicine Hannover, Foundation, Hannover, Germany" [Stiftung Tierärztliche Hochschule Hannover]; "Internships" [Praktika]; "Previous owner" [Vorbesitzer]; "Teaching material on horses" [Lehrmaterial für Pferde]

**13. Do you keep your camelids in several groups?** (Single choice. n=255)

[Halten Sie Ihre Neuweltkameliden in mehreren Gruppen? (Einfachantwort. n=255)]

- Yes [Ja]: 124 (48.6%)
- No [Nein]: 121 (47.5%)
- No information [Keine Antwort]: 10 (3.9%)

**14. What is the average number of animals per group? (excluding small separate groups, e.g. small groups of males)** (If "yes" to question 13. Single choice. n=124)

[Wie viele Tiere befinden sich durchschnittlich in einer Gruppe? (kleine separate Gruppen ausgenommen, z.B. Hengstgruppen) (Wenn „Ja“ bei Frage 13. Einfachantwort. n=124)]

- <10 animals [<10 Tiere]: 72 (58.1%)
- 10-20 animals [10-20 Tiere]: 43 (34.7%)
- >20 animals [>20 Tiere]: 9 (7.3%)

**15. Are your camelids kept together with another animal species/ other animal species?** (Single choice. n=255)

[Werden Ihre Neuweltkameliden mit einer anderen Tierart / mit anderen Tierarten zusammen gehalten? (Einfachantwort. n=255)]

- Yes [Ja]: 17 (6.7%)
- No [Nein]: 235 (92.2%)
- No information [Keine Antwort]: 3 (1.2%)

**16. Which animal species do you keep your camelids with?** (If "yes" to question 15. Multiple choice. n=17)

[Mit welcher Tierart / mit welchen Tierarten halten Sie Ihre Neuweltkameliden zusammen? (Wenn „Ja“ bei Frage 15. Mehrfachantwort. n=17)]

- Poultry [Geflügel]: 11 (64.7%)
- Sheep [Schafe]: 5 (29.4%)

- Goats [Ziegen]: 5 (29.4%)
- Cattle [Rinder]: 2 (11.8%)
- Pigs [Schweine]: 1 (5.9%)
- Horses [Pferde]: 1 (5.9%)
- Other [Sonstiges]: 2 (11.8%)
  - "Donkeys" [Esel]; "Dogs/cats" [Hunde/Katzen]

**17. How do you house your camelids?** (Single choice. n=255)

[Wie ist die Unterbringung Ihrer Neuweltkameliden? (Einfachantwort. n=255)]

- Stable and pasture [Stall und Weide]: 140 (54.9%)
- Pasture/paddock with shelter [Weide / Paddock mit Unterstand]: 93 (36.5%)
- Stable with paddock [Stall mit Außenbereich]: 18 (7.1%)
- Pasture [Weide]: 1 (0.4%)
- Stable [Stall]: 1 (0.4%)
- No information [keine Antwort]: 2 (0.8%)

**18. What's the approximate size of the stable?** (If "stable", "stable with paddock", "stable and pasture" at question 17. Single choice. n=152)

[Wie groß ist der Stall ungefähr? (Wenn „Stall“, „Stall mit Außenbereich“, „Stall und Weide“ bei Frage 17. Einfachantwort. n=152)]

- Minimum: 5m<sup>2</sup>
- Maximum: 500m<sup>2</sup>
- Mean value [Mittelwert]: 66.3m<sup>2</sup>
- Median: 43m<sup>2</sup>

**19. What sort of flooring/litter do you have in the stables?** (If "stable", "stable with paddock", "stable and pasture" at question 17. Multiple choice. n=159)

[Welchen Fußboden / welche Einstreu haben Sie in den Stallungen? (Wenn „Stall“, „Stall mit Außenbereich“, „Stall und Weide“ bei Frage 17. Mehrfachantwort. n=159)]

- Concrete [Beton]: 104 (65.4%)
- Straw [Stroh]: 86 (54.1%)
- Rubber mats [Gummimatten]: 51 (32.1%)
- Wood shavings [Sägespäne]: 30 (18.9%)
- Hay [Heu]: 24 (15.1%)
- Soil [Erde]: 23 (14.5%)
- Wooden floor [Holz]: 12 (7.5%)
- Sand [Sand]: 10 (6.3%)
- Other [Sonstiges]: 22 (13.8%)
  - "(Wood-, straw-, miscanthus-) pellets" [Holz-, Stroh-, Miscanthus-Pellets]; "Straw meal" [Strohmehl]; "Hemp bedding" [Hanfstreu]; "Paving stones" [Pflastersteine]; "Flax bedding" [Leinstroh]; "Chopped straw" [Strohhäcksel]; "Concrete slabs" [Betonplatten]; "Gravel" [Schotter]; "Brick" [Klinker]; "Stone" [Steine]

**20. How large is the pasture / the paddock? If there are several pastures, indicate the average size of one pasture.** (If "pasture", "pasture/paddock with shelter", "stable with paddock", "stable and pasture" at question 17. Single choice. n=244)

[Wie groß ist Ihre Weide / Auslaufläche ungefähr? Wenn mehrere Weiden vorhanden, dann Angabe der durchschnittlichen Größe einer Weide. (Wenn „Weide“, „Weide / Paddock mit Unterstand“, „Stall mit Außenbereich“, „Stall und Weide“ bei Frage 17. Einfachantwort. n=244)]

- Minimum: 4m<sup>2</sup>

- Maximum: 110,000m<sup>2</sup>
- Mean value [Mittelwert]: 8961.2m<sup>2</sup>
- Median: 5000m<sup>2</sup>

**21. How many pastures/paddocks do you have for your camelids?** (If “pasture”, “pasture/paddock with shelter”, “stable with paddock”, “stable and pasture” at question 17. Single choice. n=252)

[Wie viele verschiedene Weiden / Auslauflächen stehen den Neuweltkameliden zur Verfügung? (Wenn „Weide“, „Weide / Paddock mit Unterstand“, „Stall mit Außenbereich“, „Stall und Weide“ bei Frage 17. Einfachantwort. n=252)]

- 1: 14 (5.6%)
- 2: 63 (25.0%)
- 3: 71 (28.2%)
- 4: 44 (17.5%)
- 5: 19 (7.5%)
- 6: 12 (4.8%)
- 7: 13 (5.2%)
- 8: 8 (3.2%)
- 9: 1 (0.4%)
- 10: 4 (1.6%)
- More than 10 [Mehr als 10]: 2 (0.8%)
- No information [Keine Antwort]: 1 (0.4%)

**22. Do the camelids change pastures (rotation system)?** (If “pasture”, “pasture/paddock with shelter”, “stable with paddock”, “stable and pasture” at question 17. Single choice. n=252)

[Wechseln die Neuweltkameliden die Weide-/Auslauflächen (Rotationssystem)? (Wenn „Weide“, „Weide / Paddock mit Unterstand“, „Stall mit Außenbereich“, „Stall und Weide“ bei Frage 17. Einfachantwort. n=252)]

- Yes [Ja]: 198 (78.6%)
- No [Nein]: 44 (17.5%)
- No information [keine Antwort]: 10 (4.0%)

### Part C: Feeding [Teil C: Fütterung]

**23. What is the main feed in summer?** (Multiple choice. n=253)

[Welches Grundfutter / Hauptfutter füttern Sie im Sommer? (Mehrfachantwort. n=253)]

- Pasture grass [Weidegras]: 248 (98.0%)
- Hay [Heu]: 238 (94.1%)
- Straw [Stroh]: 15 (5.9%)
- Haylage [Heulage]: 3 (1.2%)
- Silage [Grassilage]: 1 (0.4%)
- Hay made from reed [Reetheu]: 1 (0.4%)
- Other [Sonstiges]: 2 (0.8%)
  - “Grass pellets” [Graspellets]; “Lucerne” [Luzerne]

**24. What is the main feed in winter?** (Multiple choice. n=253)

[Welches Grundfutter / Hauptfutter füttern Sie im Winter? (Mehrfachantwort. n=253)]

- Hay [Heu]: 250 (98.8%)
- Pasture grass [Weidegras]: 108 (42.7%)
- Straw [Stroh]: 22 (8.7%)
- Haylage [Heulage]: 7 (2.8%)
- Silage [Grassilage]: 2 (0.8%)
- Hay made from reed [Reetheu]: 1 (0.4%)

- Other [Sonstiges]: 23 (9.1%)
  - “Lucerne (-hay; -pellets)” [Luzerne (-Heu; -Pellets)]; “Willow branches” [Weidenäste]; “Aftergrass” [Öhmal]; “Grass pellets” [Graspellets]; “Pressed beet pulp” [gepresste Rübenschnitzel]; “Dried herbs” [getrocknete Kräuter]

**25. How much basic feed do you feed the animals (main feed)?** (Single choice. n=255)

[Wie viel Grundfutter füttern Sie? (Einfachantwort. n=255)]

- Ad libitum [zur freien Verfügung]: 233 (91.4%)
- A limited amount of feed [begrenzte Futtermenge]: 19 (7.5%)
- No information [keine Antwort]: 3 (1.2%)

**26. Do you add other components to the main diet?** (Multiple choice. n=251)

[Füttern Sie andere Futtermittel zusätzlich zu? (Mehrfachantwort. n=251)]

- No additional feed [es wird nichts weiter zugefüttert]: 8 (3.2%)
- Mineral feed [Mineralfutter]: 216 (86.1%)
- Concentrate [Kraftfutter]: 107 (42.6%)
- Vegetables [Gemüse]: 23 (9.2%)
- Fruit [Obst]: 14 (5.6%)
- Other [Sonstiges]: 47 (18.7%)
  - “Lucerne” [Luzerne]; “Herbs” [Kräuter]; “Corn cobs” [Maiscobs]; “Beet pulp” [Rübenschnitzel]; “Treacle” [Melasse]; “Linseed cake” [Leinkuchen]; “Wheat bran” [Weizenkleie]; “Leaves” [Blätter]

**27. Does the concentrate or mineral feed contain vitamin D?** (If “concentrate”, “mineral feed” at question 26.

Single choice. n=235)

[Ist dem Kraftfutter oder Mineralfutter Vitamin D zugesetzt? (Wenn „Kraftfutter“, „Mineralfutter“ bei Frage 26. Einfachantwort. n=235)]

- Yes [Ja]: 151 (64.3%)
- No [Nein]: 40 (17.0%)
- No information [keine Antwort]: 44 (18.7%)

**28. If known: How much vitamin D is contained in the concentrate/mineral feed per kg dry matter (indicating the unit)?** (If “yes” at question 27. Free text. n=151)

[Falls bekannt: Wie viel Vitamin D ist in dem Kraft- bzw. Mineralfutter pro kg Trockensubstanz (TS) enthalten (mit Angabe der Einheit)? (Wenn „Ja“ bei Frage 27. Freitext. n=151)]

- Answered [Antwort gegeben]: 41 (27.2%)
  - Minimum: 1,400 IU per kg dry matter
  - Maximum: 108,000 IU per kg dry matter
- No information [keine Antwort]: 110 (72.8%)

**Part D: Management** [Teil D: Management]

**29. Are new animals regularly added to the stock (own offspring excluded)?** (Single choice. n=255)

[Kommen regelmäßig neue Tiere in den Bestand? (Eigene Nachzucht ausgenommen) (Einfachantwort. n=255)]

- Yes [Ja]: 37 (14.5%)
- No [Nein]: 211 (82.7%)
- No information [keine Antwort]: 7 (2.7%)

**30. Where do new animals come from?** (If “yes” to question 29. Multiple choice. n=37)

[Woher kommen neue Tiere? (Wenn „Ja“ bei Frage 29. Mehrfachantwort. n=37)]

- Different stocks in Germany [*von verschiedenen Betrieben in Deutschland*]: 30 (81.1%)
- Stocks from abroad (EU) [*von Betrieben aus dem EU-Ausland*]: 9 (24.3%)
- Stocks from abroad (outside the EU) [*von Betrieben aus dem Nicht-EU-Ausland*]: 9 (24.3%)
- One other stock in Germany [*von einem einzigen anderen Betrieb in Deutschland*]: 2 (5.4%)

**31. Are new animals kept separately for some time before joining the flock?** (If “yes” at question 29. Single choice. n=37)

[*Werden neue Tiere vor Eingliederung in die Herde für einige Zeit separat gehalten? (Wenn „Ja“ bei Frage 29. Einfachantwort. n=37)*]

- No [*Nein*]: 19 (51.4%)
- Yes [*Ja*]: 18 (48.6%)

**32. How long are the new animals kept separately?** (If “yes” at question 31. Single choice. n=18)

[*Wie lange werden die Tiere separat gehalten? (Wenn „Ja“ bei Frage 31. Einfachantwort. n=18)*]

- <1 week [*<1 Woche*]: 2 (11.1%)
- 1 week [*1 Woche*]: 0 (0%)
- 2 weeks [*2 Wochen*]: 8 (44.4%)
- 3 weeks [*3 Wochen*]: 2 (11.1%)
- 4 weeks [*4 Wochen*]: 3 (16.7%)
- 5 weeks [*5 Wochen*]: 0 (0%)
- 6 weeks [*6 Wochen*]: 1 (5.6%)
- >6 weeks [*>6 Wochen*]: 2 (11.1%)

**33. Do you have proof of origin for your camelids (pedigree)?** (Single choice. n=255)

[*Haben Sie einen Verwandtschaftsstatus / Herkunftsnachweise Ihrer Neuweltkameliden (Ahnentafel)? (Einfachantwort. n=255)*]

- Yes [*Ja*]: 176 (69.0%)
- For certain animals only [*nur von bestimmten Tieren*]: 44 (17.3%)
- No [*Nein*]: 30 (11.8%)
- No information [*keine Antwort*]: 5 (2.0%)

**34. Do you mark your animals (animal identification) and if so, how?** (Multiple choice. n=245)

[*Kennzeichnen Sie Ihre Tiere (Tieridentifikation) und wenn ja, wie? (Mehrfachantwort. n=245)*]

- No marking [*keine Kennzeichnung*]: 45 (18.4%)
- Transponder (chip): 199 (81.2%)
- Ear tag [*Ohrmarke*]: 4 (1.6%)
- Other [*Sonstiges*]: 4 (1.6%)
  - “DNA-profile” [*DNA-Profil*]

**35. How often do you shear the alpacas?** (If “a” at question 2. Single choice. n=222)

[*Wie oft scheren Sie Ihre Alpakas? (Wenn „a“ bei Frage 2. Einfachantwort. n=222)*]

- Never [*nie*]: 0 (0%)
- Every other year [*alle 2 Jahre*]: 2 (0.9%)
- Once a year [*1x pro Jahr*]: 217 (97.7%)
- Twice a year [*2x pro Jahr*]: 0 (0%)
- More than twice a year [*mehr als 2x pro Jahr*]: 0 (0%)
- Other [*Sonstiges*]: 1 (0.5%)



- “Huacaya-alpacas once a year, Suri-alpacas every 1-2 years” [*Huacaya-Alpakas 1x jährlich, Suri-Alpakas alle 1-2 Jahre*]
- No information [*keine Antwort*]: 2 (0.9%)

**36. How often do you shear the llamas?** (If “b” at question 2. Single choice. n=75)

[*Wie oft scheren Sie Ihre Lamas? (Wenn „b“ bei Frage 2. Einfachantwort. n=75)*]

- Never [*nie*]: 0 (0%)
- Every other year [*alle 2 Jahre*]: 8 (10.7%)
- Once a year [*1x pro Jahr*]: 59 (78.7%)
- Twice a year [*2x pro Jahr*]: 0 (0%)
- More than twice a year [*mehr als 2x pro Jahr*]: 0 (0%)
- Other [*Sonstiges*]: 6 (8.0%)
  - “Variable time periods” [*variable Zeitspannen*]
- No information [*keine Antwort*]: 2 (2.7%)

**37. Who shears your animals?** (If “more than twice a year”, “twice a year”, “once a year”, every other year”, “other” at question 35/36. Multiple choice. n=249)

[*Wer führt die Schur durch? (Wenn „Mehr als 2x pro Jahr“, „2x pro Jahr“, „1x pro Jahr“, „alle 2 Jahre“, „Sonstiges“ bei Frage 35/36. Mehrfachantwort. n=249)*]

- Mobile shearing service [*mobile Scherservice*]: 152 (61.0%)
- Is performed by yourself [*wird selbst durchgeführt*]: 102 (41.0%)
- Other [*Sonstiges*]: 16 (6.4%)
  - “Llama-/alpaca-breeder” [*Züchter*]; “Veterinarian” [*Tierarzt*]

**38. How are your animals fixed during shearing?** (If “more than twice a year”, “twice a year”, “once a year”, every other year”, “other” at question 35/36. Multiple choice. n=249)

[*Wie werden Ihre Tiere während der Schur fixiert? (Wenn „Mehr als 2x pro Jahr“, „2x pro Jahr“, „1x pro Jahr“, „alle 2 Jahre“, „Sonstiges“ bei Frage 35/36. Mehrfachantwort. n=249)*]

- Fixation on the shearing table [*Fixation auf dem Schertisch*]: 112 (45.0%)
- Fixation on the ground [*Fixation auf dem Boden*]: 88 (35.3%)
- Fixation in standing position [*Fixation im Stehen*]: 52 (20.9%)
- Animals are tied up [*Tiere werden ausgebunden*]: 12 (4.8%)
- Other [*Sonstiges*]: 31 (12.4%)
  - “Without fixation” [*ohne Fixation*]; “Loosely tied” [*locker angebunden*]
- No information [*keine Antwort*]: 2 (0.8%)

**39. Do you cut your animals’ toenails?** (Single choice. n=255)

[*Werden die Zehennägel der Tiere manchmal geschnitten? (Einfachantwort. n=255)*]

- Yes [*Ja*]: 242 (94.9%)
- No [*Nein*]: 6 (2.4%)
- No information [*keine Antwort*]: 7 (2.7%)

**40. Who cuts the toenails of your animals?** (If “yes” to question 39. Multiple choice. n=242)

[*Wer schneidet die Zehennägel Ihrer Neuweltkameliden? (Wenn „Ja“ bei Frage 39. Mehrfachantwort. n=242)*]

- Performed by yourself [*wird selbst durchgeführt*]: 222 (91.7%)
- Veterinarian [*Tierarzt/Tierärztin*]: 13 (5.4%)
- Llama/alpaca breeder [*ZüchterIn*]: 12 (5.0%)
- Shearer [*SchererIn*]: 11 (4.5%)
- Other [*Sonstiges*]: 3 (1.2%)

- “Claw trimmer” [Klauenpfleger]; “Friends/relatives” [Freunde/Bekannte]

**41. How often do you cut the toenails of your camelids?** (If “yes” to question 39. Single choice. n=242)  
[Wie oft schneiden Sie die Nägel? (Wenn „Ja“ bei Frage 39. Einfachantwort. n=242)]

- If needed [bei Bedarf]: 100 (41.3%)
- More than twice a year [mehr als 2x pro Jahr]: 92 (38.0%)
- Twice a year [2x pro Jahr]: 18 (7.4%)
- Once a year [1x pro Jahr]: 13 (5.4%)
- Every other year [alle 2 Jahre]: 0 (0%)
- Other [Sonstiges]: 19 (7.9%)
  - “Variable time periods” [variable Zeitspannen]; “Light-coloured animals more often than dark-coloured animals” [helle Tiere häufiger als dunkle Tiere]

**42. Do you sometimes shorten the fighting teeth of your adult males?** (Single choice. n=255)  
[Werden in Ihrem Bestand manchmal die Kampfzähne bei adulten Hengsten gekürzt? (Einfachantwort. n=255)]

- Yes [Ja]: 120 (47.1%)
- No [Nein]: 120 (47.1%)
- No information [keine Antwort]: 15 (5.9%)

**43. Who performs this surgery?** (If “yes” to question 42. Multiple choice. n=120)  
[Wer führt diesen Eingriff durch? (Wenn „Ja“ bei Frage 42. Mehrfachantwort. n=120)]

- Veterinarian [Tierarzt/Tierärztin]: 67 (55.8%)
- Performed by yourself [wird selbst durchgeführt]: 25 (20.8%)
- Shearer [SchererIn]: 24 (20.0%)
- Llama/alpaca breeder [ZüchterIn]: 10 (8.3%)
- Other [Sonstiges]: 2 (1.7%)
  - “Dental technician” [Zahntechniker]; “Animal keeper” [Tierpfleger]
- No information [keine Antwort]: 4 (3.3%)

**44. Do you vaccinate your camelids?** (Single choice. n=255)  
[Werden Ihre Tiere geimpft? (Einfachantwort. n=255)]

- Yes [Ja]: 215 (84.3%)
- No [Nein]: 31 (12.2%)
- No information [keine Antwort]: 9 (3.5%)

**45. What are they vaccinated against?** (If “yes” at question 44. Multiple choice. n=215)  
[Wogegen werden Ihre Neuweltkameliden geimpft? (Wenn „Ja“ bei Frage 44. Mehrfachantwort. n=215)]

- Clostridial infections in general [Clostridieninfektionen allgemein]: 169 (78.6%)
- Not known [unklar]: 22 (10.2%)
- Tetanus in particular [speziell Tetanus]: 17 (7.9%)
- Chlamydial abortion [Chlamydienabort]: 17 (7.9%)
- Bluetongue disease [Blauzungkrankheit]: 16 (7.4%)
- Rabies [Tollwut]: 11 (5.1%)
- Other [Sonstiges]: 0 (0%)
- No information [keine Antwort]: 8 (3.7%)

**46. How often do you vaccinate your camelids?** (If “yes” at question 44. Multiple choice, comments optional. n=215)  
[Wie häufig impfen Sie? (Wenn „Ja“ bei Frage 44. Mehrfachantwort mit Kommentarfunktion. n=215)]

- Three times a year [*3x jährlich*]: 2 (0.9%)
- Twice a year [*2x jährlich*]: 14 (6.5%)
- Once a year [*1x jährlich*]: 184 (85.6%)
- Every other year [*alle 2 Jahre*]: 11 (5.1%)
- Once in a lifetime [*1x im Leben*]: 3 (1.4%)
- Other [*Sonstiges*]: 5 (2.3%)
  - “Decision of the vet” [*nach Ansage des Tierarztes*]; “Every five years” [*alle 5 Jahre*]
- No information [*keine Antwort*]: 5 (2.3%)

**47. Do you deworm your camelids?** (Single choice. n=255)

[*Werden Ihre Tiere entwurmt? (Einfachantwort. n=255)*]

- Yes [*Ja*]: 228 (89.4%)
- No [*Nein*]: 13 (5.1%)
- No information [*keine Antwort*]: 14 (5.5%)

**48. How do you deworm your camelids?** (If “yes” at question 47. Multiple choice. n=228)

[*Wie entwurmen Sie Ihre Tiere? (Wenn „Ja“ bei Frage 47. Mehrfachantwort. n=228)*]

- By injection [*per Injektion*]: 152 (66.7%)
- Oral application [*orale Eingabe*]: 119 (52.2%)
- Other [*Sonstiges*]: 10 (4.4%)
  - “Alternately oral application and injection” [*oral und per Injektion im Wechsel*]; “For application on the skin” [*zum Auftragen auf die Haut*]; “Worm herbs” [*Wurmkräuter*]
- No information [*keine Angabe*]: 6 (2.6%)

**49. How frequently do you deworm them?** (If “yes” at question 47. Single choice. n=228)

[*Wie häufig entwurmen Sie? (Wenn „Ja“ bei Frage 47. Einfachantwort. n=228)*]

- Less than once a year [*seltener als 1x pro Jahr*]: 3 (1.3%)
- Once a year [*1x pro Jahr*]: 26 (11.4%)
- Twice a year [*2x pro Jahr*]: 42 (18.4%)
- Three times a year [*3x pro Jahr*]: 13 (5.7%)
- Four times a year [*4x pro Jahr*]: 1 (0.4%)
- Following regular parasitological faecal analyses (depending on the results of the **individual faecal samples**) [*nach regelmäßigen parasitologischen Kotuntersuchungen (je nach Ergebnis der Einzelkotproben)*]: 65 (28.5%)
- Following regular parasitological faecal analyses (depending on the results of the **pooled faecal samples**) [*nach regelmäßigen parasitologischen Kotuntersuchungen (je nach Ergebnis der Sammelkotproben)*]: 78 (34.2%)

**50. Do you monitor how successful the deworming treatment is?** (If “yes” at question 47. Multiple choice. n=228)

[*Wird der Entwurmungserfolg kontrolliert? (Wenn „Ja“ bei Frage 47. Mehrfachantwort. n=228)*]

- No specific control [*nein, keine spezielle Kontrolle*]: 98 (43.0%)
- Yes, by analysing faecal samples after deworming [*ja, mittels parasitologischer Kotprobenuntersuchung nach der Entwurmung*]: 71 (31.1%)
- Yes, by checking the general condition after deworming [*ja, mittels Kontrolle des Allgemeinbefindens nach der Entwurmung*]: 50 (21.9%)
- Yes, by monitoring weight gain after deworming [*ja, mittels Kontrolle der Gewichtszunahme nach der Entwurmung*]: 22 (9.6%)
- No information [*keine Antwort*]: 9 (3.9%)

**51. Do you change the drug group for deworming from time to time?** (If “yes” at question 47. Single choice. n=228)

[Wechseln Sie die Wirkstoffgruppe zur Entwurmung von Zeit zu Zeit? (Wenn „Ja“ bei Frage 47. Einfachantwort. n=228)]

- Yes [ja]: 167 (73.2%)
- No [nein]: 52 (22.8%)
- No information [keine Antwort]: 9 (3.9%)

**52. Are additional vitamin and trace element formulations administered as an injection in your stock?** (Single choice. n=255)

[Werden in Ihrem Bestand zusätzliche Vitamin- und Spurenelementpräparate per Injektion verabreicht? (Einfachantwort. n=255)]

- No [nein]: 174 (68.2%)
- Yes [ja]: 70 (27.5%)
- No information [keine Antwort]: 11 (4.3%)

**53. Which preparations are additionally administered?** (If “yes” at question 52. Multiple choice. n=70. Second percentage applies to all participants (n=255))

[Welche Präparate werden zusätzlich verabreicht? (Wenn „Ja“ bei Frage 52. Mehrfachantwort. n=70. Zweite Prozentzahl in Bezug auf alle Halter (n=255))]

- Vitamin E/selenium [Vitamin E/Selen]: 57 (81.4% / 22.4%)
- Vitamin D: 44 (62.9% / 17.3%)
- Other [Sonstiges]: 12 (17.1% / 4.7%)
  - “Vitamin-B-complex” [Vitamin-B-Komplex]; “Vitamin ADE” [Vitamin ADE]; “Zinc” [Zink]; “Vitamin B12” [Vitamin B12]; “Phosphor” [Phosphor]
- No information [keine Angabe]: 2 (2.9%)

**Part E: diseases [Teil E: Krankheiten]**

**54. Please cross whether and how often the listed diseases / disease symptoms occur in your stock (sick animals per year). 1. Digestive tract** (Single choice. n=255)

[Bitte kreuzen Sie an, ob und wie häufig gelistete Krankheiten / Krankheitssymptome in Ihrem Bestand auftreten (Anzahl der erkrankten Tiere pro Jahr). 1. Verdauungsapparat (Einfachantwort. n=255)]

- Gastrointestinal parasites [Magen-Darm-Parasiten]
  - Never [nie]: 89 (34.9%)
  - Less than once a year [seltener als 1x pro Jahr]: 74 (29.0%)
  - Once or twice a year [1-2x pro Jahr]: 50 (19.6%)
  - Up to ten times a year [bis zu 10x pro Jahr]: 6 (2.4%)
  - >10 times a year [>10x pro Jahr]: 2 (0.8%)
  - No information [keine Angabe]: 34 (13.3%)
- Diarrhoea [Durchfall]
  - Never [nie]: 116 (45.5%)
  - Less than once a year [seltener als 1x pro Jahr]: 62 (24.3%)
  - Once or twice a year [1-2x pro Jahr]: 31 (12.2%)
  - Up to ten times a year [bis zu 10x pro Jahr]: 1 (0.4%)
  - >10 times a year [>10x pro Jahr]: 0 (0%)
  - No information [keine Angabe]: 45 (17.6%)
- Colic [Koliken]
  - Never [nie]: 161 (63.1%)
  - Less than once a year [seltener als 1x pro Jahr]: 29 (11.4%)

- Once or twice a year [1-2x pro Jahr]: 9 (3.5%)
- Up to ten times a year [bis zu 10x pro Jahr]: 0 (0%)
- >10 times a year [>10x pro Jahr]: 1 (0.4%)
- No information [keine Angabe]: 55 (21.6%)
- Dental issues [Zahnprobleme]
  - Never [nie]: 116 (45.5%)
  - Less than once a year [seltener als 1x pro Jahr]: 67 (26.3%)
  - Once or twice a year [1-2x pro Jahr]: 20 (7.8%)
  - Up to ten times a year [bis zu 10x pro Jahr]: 1 (0.4%)
  - >10 times a year [>10x pro Jahr]: 0 (0%)
  - No information [keine Angabe]: 51 (20.0%)

**55. Please cross whether and how often the listed diseases / disease symptoms occur in your stock (sick animals per year). 2. Skin (Single choice. n=255)**

[Bitte kreuzen Sie an, ob und wie häufig gelistete Krankheiten / Krankheitssymptome in Ihrem Bestand auftreten (Anzahl der erkrankten Tiere pro Jahr). 2. Haut (Einfachantwort. n=255)]

- Ectoparasites (e.g. mange mites) [Ektoparasiten (z.B. Räudemilben)]
  - Never [nie]: 87 (34.1%)
  - Less than once a year [seltener als 1x pro Jahr]: 69 (27.1%)
  - Once or twice a year [1-2x pro Jahr]: 60 (23.5%)
  - Up to ten times a year [bis zu 10x pro Jahr]: 6 (2.4%)
  - >10 times a year [>10x pro Jahr]: 3 (1.2%)
  - No information [keine Angabe]: 30 (11.8%)
- Abscesses [Abszesse]
  - Never [nie]: 133 (52.2%)
  - Less than once a year [seltener als 1x pro Jahr]: 51 (20.0%)
  - Once or twice a year [1-2x pro Jahr]: 11 (4.3%)
  - Up to ten times a year [bis zu 10x pro Jahr]: 0 (0%)
  - >10 times a year [>10x pro Jahr]: 0 (0%)
  - No information [keine Angabe]: 60 (23.5%)
- Mycosis [Pilzinfektionen]
  - Never [nie]: 156 (61.2%)
  - Less than once a year [seltener als 1x pro Jahr]: 31 (12.2%)
  - Once or twice a year [1-2x pro Jahr]: 2 (0.8%)
  - Up to ten times a year [bis zu 10x pro Jahr]: 0 (0%)
  - >10 times a year [>10x pro Jahr]: 0 (0%)
  - No information [keine Angabe]: 66 (25.9%)
- Injuries due to rank fights [Verletzungen durch Rangordnungskämpfe]
  - Never [nie]: 126 (49.4%)
  - Less than once a year [seltener als 1x pro Jahr]: 51 (20.0%)
  - Once or twice a year [1-2x pro Jahr]: 23 (9.0%)
  - Up to ten times a year [bis zu 10x pro Jahr]: 2 (0.8%)
  - >10 times a year [>10x pro Jahr]: 0 (0%)
  - No information [keine Angabe]: 53 (20.8%)
- Other skin issues [Andere Hautprobleme]
  - Never [nie]: 115 (45.1%)
  - Less than once a year [seltener als 1x pro Jahr]: 47 (18.4%)
  - Once or twice a year [1-2x pro Jahr]: 17 (6.7%)
  - Up to ten times a year [bis zu 10x pro Jahr]: 1 (0.4%)
  - >10 times a year [>10x pro Jahr]: 1 (0.4%)
  - No information [keine Angabe]: 74 (29.0%)

**56. Please cross whether and how often the listed diseases / disease symptoms occur in your stock (sick animals per year). 3. Reproduction** (Single choice. n=255)

[Bitte kreuzen Sie an, ob und wie häufig gelistete Krankheiten / Krankheitssymptome in Ihrem Bestand auftreten (Anzahl der erkrankten Tiere pro Jahr). 3. Fortpflanzung (Einfachantwort. n=255)]

- Abortions (miscarriages) [Aborte (Fehlgeburt)]
  - Never [nie]: 109 (42.7%)
  - Less than once a year [seltener als 1x pro Jahr]: 59 (23.1%)
  - Once or twice a year [1-2x pro Jahr]: 9 (3.5%)
  - Up to ten times a year [bis zu 10x pro Jahr]: 1 (0.4%)
  - >10 times a year [>10x pro Jahr]: 0 (0%)
  - No information [keine Angabe]: 77 (30.2%)
- Stillbirths [Totgeburten]
  - Never [nie]: 122 (47.8%)
  - Less than once a year [seltener als 1x pro Jahr]: 48 (18.8%)
  - Once or twice a year [1-2x pro Jahr]: 7 (2.7%)
  - Up to ten times a year [bis zu 10x pro Jahr]: 0 (0%)
  - >10 times a year [>10x pro Jahr]: 0 (0%)
  - No information [keine Angabe]: 78 (30.6%)
- Difficult births [Schwengeburten]
  - Never [nie]: 121 (47.5%)
  - Less than once a year [seltener als 1x pro Jahr]: 35 (13.7%)
  - Once or twice a year [1-2x pro Jahr]: 13 (5.1%)
  - Up to ten times a year [bis zu 10x pro Jahr]: 1 (0.4%)
  - >10 times a year [>10x pro Jahr]: 0 (0%)
  - No information [keine Angabe]: 85 (33.3%)
- Stunted growth [Kümmerer-Fohlen]
  - Never [nie]: 128 (50.2%)
  - Less than once a year [seltener als 1x pro Jahr]: 35 (13.7%)
  - Once or twice a year [1-2x pro Jahr]: 5 (2.0%)
  - Up to ten times a year [bis zu 10x pro Jahr]: 0 (0%)
  - >10 times a year [>10x pro Jahr]: 0 (0%)
  - No information [keine Angabe]: 87 (34.1%)
- Malformations in crias [Missbildungen der Fohlen]
  - Never [nie]: 145 (56.9%)
  - Less than once a year [seltener als 1x pro Jahr]: 20 (7.8%)
  - Once or twice a year [1-2x pro Jahr]: 2 (0.8%)
  - Up to ten times a year [bis zu 10x pro Jahr]: 0 (0%)
  - >10 times a year [>10x pro Jahr]: 0 (0%)
  - No information [keine Angabe]: 88 (34.5%)
- Lack of milk in females [Milchmangel der Stuten]
  - Never [nie]: 128 (50.2%)
  - Less than once a year [seltener als 1x pro Jahr]: 31 (12.2%)
  - Once or twice a year [1-2x pro Jahr]: 8 (3.1%)
  - Up to ten times a year [bis zu 10x pro Jahr]: 0 (0%)
  - >10 times a year [>10x pro Jahr]: 0 (0%)
  - No information [keine Angabe]: 88 (34.5%)
- Fertility disorders [Fruchtbarkeitsstörungen]
  - Never [nie]: 110 (43.1%)
  - Less than once a year [seltener als 1x pro Jahr]: 41 (16.1%)
  - Once or twice a year [1-2x pro Jahr]: 16 (6.3%)
  - Up to ten times a year [bis zu 10x pro Jahr]: 4 (1.6%)
  - >10 times a year [>10x pro Jahr]: 0 (0%)
  - No information [keine Angabe]: 84 (32.9%)

**57. Please cross whether and how often the listed diseases / disease symptoms occur in your stock (sick animals per year). 4. Cardiovascular system (Single choice. n=255)**

[Bitte kreuzen Sie an, ob und wie häufig gelistete Krankheiten / Krankheitssymptome in Ihrem Bestand auftreten (Anzahl der erkrankten Tiere pro Jahr). 4. Herz-Kreislauf-Apparat (Einfachantwort. n=255)]

- Pneumonia [Lungenentzündungen]
  - Never [nie]: 183 (71.8%)
  - Less than once a year [seltener als 1x pro Jahr]: 33 (12.9%)
  - Once or twice a year [1-2x pro Jahr]: 2 (0.8%)
  - Up to ten times a year [bis zu 10x pro Jahr]: 0 (0%)
  - >10 times a year [>10x pro Jahr]: 0 (0%)
  - No information [keine Angabe]: 37 (14.5%)
- Heart murmurs / heart diseases [Herzgeräusche / Herzerkrankungen]
  - Never [nie]: 203 (79.6%)
  - Less than once a year [seltener als 1x pro Jahr]: 9 (3.5%)
  - Once or twice a year [1-2x pro Jahr]: 1 (0.4%)
  - Up to ten times a year [bis zu 10x pro Jahr]: 0 (0%)
  - >10 times a year [>10x pro Jahr]: 0 (0%)
  - No information [keine Angabe]: 42 (16.5%)
- Anaemia [Anämie (Blutarmut)]
  - Never [nie]: 180 (70.6%)
  - Less than once a year [seltener als 1x pro Jahr]: 24 (9.4%)
  - Once or twice a year [1-2x pro Jahr]: 9 (3.5%)
  - Up to ten times a year [bis zu 10x pro Jahr]: 1 (0.4%)
  - >10 times a year [>10x pro Jahr]: 0 (0%)
  - No information [keine Angabe]: 41 (16.1%)

**58. Please cross whether and how often the listed diseases / disease symptoms occur in your stock (sick animals per year). 5. Musculoskeletal system (Single choice. n=255)**

[Bitte kreuzen Sie an, ob und wie häufig gelistete Krankheiten / Krankheitssymptome in Ihrem Bestand auftreten (Anzahl der erkrankten Tiere pro Jahr). 5. Bewegungsapparat (Einfachantwort. n=255)]

- Fractures [Knochenbrüche]
  - Never [nie]: 196 (76.9%)
  - Less than once a year [seltener als 1x pro Jahr]: 21 (8.2%)
  - Once or twice a year [1-2x pro Jahr]: 0 (0%)
  - Up to ten times a year [bis zu 10x pro Jahr]: 0 (0%)
  - >10 times a year [>10x pro Jahr]: 0 (0%)
  - No information [keine Angabe]: 38 (14.9%)
- Lameness [Lahmheiten]
  - Never [nie]: 147 (57.6%)
  - Less than once a year [seltener als 1x pro Jahr]: 55 (21.6%)
  - Once or twice a year [1-2x pro Jahr]: 15 (5.9%)
  - Up to ten times a year [bis zu 10x pro Jahr]: 0 (0%)
  - >10 times a year [>10x pro Jahr]: 0 (0%)
  - No information [keine Angabe]: 38 (14.9%)
- Exposed injuries [Offene Verletzungen]
  - Never [nie]: 147 (57.6%)
  - Less than once a year [seltener als 1x pro Jahr]: 54 (21.2%)
  - Once or twice a year [1-2x pro Jahr]: 15 (5.9%)
  - Up to ten times a year [bis zu 10x pro Jahr]: 1 (0.4%)
  - >10 times a year [>10x pro Jahr]: 0 (0%)
  - No information [keine Angabe]: 38 (14.9%)

- Limb deformities [*Gliedmaßenfehlstellung*]
  - Never [*nie*]: 173 (67.8%)
  - Less than once a year [*seltener als 1x pro Jahr*]: 33 (12.9%)
  - Once or twice a year [*1-2x pro Jahr*]: 2 (0.8%)
  - Up to ten times a year [*bis zu 10x pro Jahr*]: 2 (0.8%)
  - >10 times a year [*>10x pro Jahr*]: 0 (0%)
  - No information [*keine Angabe*]: 45 (17.6%)

**59. Please cross whether and how often the listed diseases / disease symptoms occur in your stock (sick animals per year). 6. Other (Single choice. n=255)**

[*Bitte kreuzen Sie an, ob und wie häufig gelistete Krankheiten / Krankheitssymptome in Ihrem Bestand auftreten (Anzahl der erkrankten Tiere pro Jahr). 6. Sonstiges (Einfachantwort. n=255)*]

- Emaciation [*Abmagerung*]
  - Never [*nie*]: 119 (46.7%)
  - Less than once a year [*seltener als 1x pro Jahr*]: 66 (25.9%)
  - Once or twice a year [*1-2x pro Jahr*]: 30 (11.8%)
  - Up to ten times a year [*bis zu 10x pro Jahr*]: 3 (1.2%)
  - >10 times a year [*>10x pro Jahr*]: 0 (0%)
  - No information [*keine Angabe*]: 37 (14.5%)
- Recumbency [*Festliegen*]
  - Never [*nie*]: 176 (69.0%)
  - Less than once a year [*seltener als 1x pro Jahr*]: 25 (9.8%)
  - Once or twice a year [*1-2x pro Jahr*]: 3 (1.2%)
  - Up to ten times a year [*bis zu 10x pro Jahr*]: 0 (0%)
  - >10 times a year [*>10x pro Jahr*]: 1 (0.4%)
  - No information [*keine Angabe*]: 50 (19.6%)
- Central nervous disorders (e.g. walking in circles [*Zentralnervöse Probleme (z.B. im Kreis wandern)*])
  - Never [*nie*]: 196 (76.9%)
  - Less than once a year [*seltener als 1x pro Jahr*]: 9 (3.5%)
  - Once or twice a year [*1-2x pro Jahr*]: 0 (0%)
  - Up to ten times a year [*bis zu 10x pro Jahr*]: 0 (0%)
  - >10 times a year [*>10x pro Jahr*]: 0 (0%)
  - No information [*keine Angabe*]: 50 (19.6%)
- Eye diseases [*Augenkrankheiten*]
  - Never [*nie*]: 127 (49.8%)
  - Less than once a year [*seltener als 1x pro Jahr*]: 48 (18.8%)
  - Once or twice a year [*1-2x pro Jahr*]: 31 (12.2%)
  - Up to ten times a year [*bis zu 10x pro Jahr*]: 1 (0.4%)
  - >10 times a year [*>10x pro Jahr*]: 1 (0.4%)
  - No information [*keine Angabe*]: 47 (18.4%)

**60. Do other diseases/symptoms of disease occur frequently in your stock that are not listed here and that seem important to you? Please specify them here. (Free text, each named once)**

[*Kommen in Ihrem Bestand andere Krankheiten/Krankheitssymptome häufig vor, die hier nicht gelistet wurden und die Ihnen wichtig erscheinen? Bitte geben Sie diese hier an. (Freitext, je einmal genannt)*]

- “Adipositas” [*Adipositas*]; “Arthrosis” [*Arthrose*]; “Bluetongue virus infection” [*Blauzungenvirus-Infektion*]; “Borna disease virus infection” [*Bornavirus-Infektion*]; “Calcinosis” [*Kalzinose*]; “Chronic obstructive pulmonary disease” [*chronisch obstruktive Lungenerkrankung*]; “Cystitis” [*Cystitis*]; “Excess testosterone” [*Testosteronüberschuss*]; “Intestinal obstruction” [*Darmverschluss*]; “Intoxication” [*Vergiftung*]; “Mycoplasma infection” [*Mykoplasmeninfektion*]; “Oesophageal obstruction” [*Schlundverstopfung*]; “Otitis” [*Otitis*]; “Shearing injury” [*Schurverletzung*]; “Tumours” [*Tumore*];



“Urolithiasis” [Urolithiasis]; “Uterus torsion” [Uterustorsion]; “Zinc/selenium deficiency” [Zink-/Selenmangel]

**61. Are you registered with and looked after by a veterinary practice?** (Single choice. n=255)

[Werden Sie von einer festen Tierarztpraxis betreut? (Einfachantwort. n=255)]

- Yes [ja]: 223 (87.5%)
- No [nein]: 12 (4.7%)
- Different veterinary practices [wechselnde Tierarztpraxen]: 15 (5.9%)
- No information [keine Antwort]: 5 (2.0%)

**62. What kind of veterinary practice is it at present?** (If “yes”, “different veterinary practices” at question 61. Single choice. n=238)

[Um was für eine Tierarztpraxis handelt es sich derzeit? (Wenn „Ja“, „Wechselnde Tierarztpraxen“ bei Frage 61. Einfachantwort. n=238)]

- Mixed practice (Large and small animal practice) [Gemischtpraxis (Klein- und Großtiere)]: 140 (58.8%)
- Farm animal practice [Praxis für Nutztiere]: 44 (18.5%)
- Specialised camelid practice [spezialisierte Praxis für Neuweltkameliden]: 23 (9.7%)
- Equine practice [Praxis für Pferde]: 15 (6.3%)
- Small animal practice [Praxis für Kleintiere]: 4 (1.7%)
- Other [Sonstiges]: 11 (4.6%)
  - “Practice not specialised in South American camelids but with acquired knowledge” [Praxen, die sich über Neuweltkamele fortbilden, aber ohne direkte Spezialisierung]; “Veterinarian from other European country” [Tierarzt aus dem europäischen Ausland]
- No information [keine Antwort]: 1 (0.4%)

**63. How often does your current veterinarian visit on average?** (If “yes”, “different veterinary practices” at question 61. Single choice. n=238)

[Wie häufig kommt Ihr derzeitiger Haustierarzt / Ihre derzeitige Haustierärztin im Schnitt? (Wenn „Ja“, „Wechselnde Tierarztpraxen“ bei Frage 61. Einfachantwort. n=238)]

- Once a year [1x pro Jahr]: 54 (22.7%)
- Twice a year [2x pro Jahr]: 71 (29.8%)
- Three times a year [3x pro Jahr]: 41 (17.2%)
- Four times a year [4x pro Jahr]: 48 (20.2%)
- Monthly [monatlich]: 18 (7.6%)
- Several times a month [mehrmals im Monat]: 2 (0.8%)
- No information [keine Antwort]: 4 (1.7%)

**64. Do you feel well cared for by your vet and do you think that this practice possesses sufficient knowledge about camelids?** (If “yes”, “different veterinary practices” at question 61. Single choice. n=238)

[Fühlen Sie sich von Ihrem Haustierarzt / Ihrer Haustierärztin gut betreut und haben Sie das Gefühl, dass diese Praxis ausreichend Wissen über Neuweltkameliden hat? (Wenn „Ja“, „Wechselnde Tierarztpraxen“ bei Frage 61. Einfachantwort. n=238)]

- Yes [ja]: 172 (72.3%)
- No [nein]: 58 (24.4%)
- No information [keine Antwort]: 8 (3.4%)

**65. Please rate the following statement: "Veterinarians in general possess sufficient knowledge to be able to treat South American camelids."** (Single choice. n=255)

[Bitte bewerten Sie folgende Aussage: „Tierärztinnen und Tierärzte im Allgemeinen haben ausreichend Wissen zur Behandlung von Neuweltkameliden“ (Einfachantwort. n=255)]

- Strongly agree [*stimme voll zu*]: 10 (3.9%)
- More likely to agree [*stimme eher zu*]: 18 (7.1%)
- In part [*teils teils*]: 80 (31.4%)
- Agree less [*stimme weniger zu*]: 84 (32.9%)
- Disagree [*stimme gar nicht zu*]: 56 (22.0%)
- No information [*keine Antwort*]: 7 (2.7%)

**66. How would you rate your own knowledge of the main health problems of South American camelids?**

Single choice. n=255)

[Wie schätzen Sie Ihre eigenen Kenntnisse über die wichtigsten Gesundheitsprobleme bei Neuweltkameliden ein?

(Einfachantwort. n=255)]

- Outstanding knowledge [*sehr gut*]: 37 (14.5%)
- Good knowledge [*gut*]: 141 (55.3%)
- Moderate knowledge [*mäßig*]: 70 (27.5%)
- Poor knowledge [*schlecht*]: 2 (0.8%)
- No information [*keine Antwort*]: 5 (2.0%)

**67. Please evaluate to what extent veterinarians provide information about health problems of camelids.**

(Single choice. n=255)

[Bitte bewerten Sie das Vorhandensein von Informationsmaterial über Gesundheitsprobleme bei Neuweltkameliden seitens der Tierärztinnen und Tierärzte. (Einfachantwort. n=255)]

- Absolutely sufficient [*vollkommen ausreichend*]: 7 (2.7%)
- Sufficient [*ausreichend*]: 29 (11.4%)
- Mediocre [*teils teils*]: 68 (26.7%)
- Insufficient [*zu wenig*]: 99 (38.8%)
- Far too insufficient [*viel zu wenig*]: 46 (18.0%)
- No information [*keine Antwort*]: 6 (2.4%)

**68. Please evaluate to what extent veterinary offices provide information about health problems of camelids.**

(Single choice. n=255)

[Bitte bewerten Sie das Vorhandensein von Informationsmaterial über Gesundheitsprobleme bei Neuweltkameliden seitens der Veterinärämter. (Einfachantwort. n=255)]

- Absolutely sufficient [*vollkommen ausreichend*]: 1 (0.4%)
- Sufficient [*ausreichend*]: 16 (6.3%)
- Mediocre [*teils teils*]: 54 (21.2%)
- Insufficient [*zu wenig*]: 91 (35.7%)
- Far too insufficient [*viel zu wenig*]: 79 (31.0%)
- No information [*keine Antwort*]: 14 (5.5%)
